# Supplementary material for: An Investigation into the Influence of Different Types of Nesting Materials upon the Welfare of Captive Chimpanzees (Pan troglodytes)
Source: Animals (Basel). 2021 Jun 20;11(6):1835. doi: 10.3390/ani11061835 (PMC8235373; doi:10.3390/ani11061835)
Supplement: Supplementary file 1 [file animals-11-01835-s001.zip › animals-1144988-supplementary.pdf]

**Table S1.** Ethogram used during the data collection sessions on western chimpanzees (*Pan troglodytes verus*), between November 2019 and March 2020, at Tacugama Chimpanzee Sanctuary (TCS), Sierra Leone.

| Behavioural Category                             | Subcategory   | Behaviour <sup>1</sup>            | Definition                                                                                                               |
|--------------------------------------------------|---------------|-----------------------------------|--------------------------------------------------------------------------------------------------------------------------|
| Individual<br><i>Not interacting with others</i> |               | Feed (+)                          | To eat or drink                                                                                                          |
|                                                  |               | Forage (+)                        | Searching for food                                                                                                       |
|                                                  |               | Vigilant                          | Individual is in a heightened state of alert, watching his/her surroundings attentively                                  |
|                                                  |               | Locomotion (+)                    | Movement from a point A to a point B, by means of walking, running, swinging, or climbing                                |
|                                                  |               | Solitary play (+)                 | Play behaviour without the involvement of another individual                                                             |
|                                                  | Self-Directed | Manipulate Object (+)             | To explore and hold an object with hands and/or feet                                                                     |
|                                                  |               | Autogrooming (-)                  | To groom oneself                                                                                                         |
|                                                  |               | Scratch (-)                       | To scratch oneself                                                                                                       |
|                                                  |               | Genital manipulation (-)          | Manipulation of own genitals - includes masturbation                                                                     |
|                                                  |               | Wadging (-)                       | Re-chewing food into a ball                                                                                              |
| Abnormal                                         |               | Stereotyped movement (-)          | Repetition of an unnecessary body motion numerous times e.g. rocking, pacing                                             |
|                                                  |               | Urophagy/ Coprophagy (-)          | Ingestion of urine (urophagy) or faeces (coprophagy), belonging to one's self or another                                 |
|                                                  |               | Regurgitation (-)                 | Expulsion of previously digested food to an exterior substrate (e.g. floor, platform), and its subsequent consumption    |
|                                                  |               | Abnormal Genital Manipulation (-) | Manipulation of own genitals in an abnormal manner e.g. Masturbating with faeces                                         |
|                                                  |               | Abnormal Object Manipulation (-)  | Manipulation of own, or another individual's, faeces, or urine                                                           |
| Social<br><i>Interacting with others</i>         | Affiliative   | Allogrooming                      | To groom another individual                                                                                              |
|                                                  |               | Play Attempt                      | Game incitement behaviour towards another individual                                                                     |
|                                                  |               | Play                              | Playful interactions, often accompanied by a play face, including chasing, wrestling, tickling                           |
|                                                  | Sexual        | Copulation/ Attempted Copulation  | Sexual intercourse                                                                                                       |
|                                                  |               | Genital Inspection                | Examination of another individual's genitals                                                                             |
|                                                  |               | Genital Presentation              | Directing own genitals towards another individual                                                                        |
|                                                  | Agonistic     | Hit                               | To hit or slap another individual                                                                                        |
|                                                  |               | Kick                              | To kick another individual                                                                                               |
|                                                  |               | Bite                              | To bite another individual                                                                                               |
|                                                  |               | Chase                             | To pursue another individual                                                                                             |
|                                                  |               | Flee                              | To escape from an individual                                                                                             |
|                                                  |               | Display                           | Intimidatory behaviour, including swaying, slapping substrate, shaking enclosure bars, often accompanied by piloerection |
|                                                  |               | Fight                             | Repeated hits or kicks towards another individual                                                                        |
|                                                  |               | Scream                            | Screaming vocalization associated with anxiousness - often performed after fighting                                      |

**Table S1 (cont).** Ethogram used during the data collection sessions on western chimpanzees (*Pan troglodytes verus*), between November 2019 and March 2020, at TCS, Sierra Leone.

|            |                           |                                                                                         |
|------------|---------------------------|-----------------------------------------------------------------------------------------|
| Enrichment | <b>Cover (+)</b>          | <b>To cover body with enrichment</b>                                                    |
|            | Make nest (+)             | To make nest using the enrichment                                                       |
|            | Eat / Chew (+)            | To chew, or wadge on enrichment material                                                |
|            | Tear with mouth (+)       | Individual alters initial size and structure of material using their mouth              |
|            | Tear with hands (+)       | Individual alters initial size and structure of material with the use of hands          |
|            | Manipulate with hands (+) | Any other manipulation/ exploration of enrichment with hands, excluding tearing         |
|            | Travel (+)                | To purposefully move enrichment from one location to another                            |
| Rest       | Sit (-)                   | When not actively engaging in any other behaviour, apart from sitting                   |
|            | Stand (-)                 | When not actively engaging in any other behaviour, apart from standing                  |
|            | Lie (-)                   | When not actively engaging in any other behaviour, apart from lying - includes sleeping |

<sup>1</sup> (+) refers to positive individual behaviours, and (-) refers to negative individual behaviours
